# Supplementary material
Source: PubMed Central journal article supplement (PMC5940429)
Supplement: jcsm.14.5.785s1.pdf [file jcsm.14.5.785s1.pdf]

**Table S1**—Norms of neuropsychological tests used in our study.

| <b>Tests</b>                                      | <b>Borderlines<sup>a</sup>/Norms<sup>b</sup></b>                                                                             |              |              |              |              |
|---------------------------------------------------|------------------------------------------------------------------------------------------------------------------------------|--------------|--------------|--------------|--------------|
| Mini-Mental State Examination <sup>a,1</sup>      | Illiterate: 17; Education within 6 years: 20; education above 6 years: 24                                                    |              |              |              |              |
| Stroop Color Word Test                            | No norms or borderlines could be provided                                                                                    |              |              |              |              |
| Auditory Verbal Learning Test <sup>b,1</sup>      |                                                                                                                              | 50-59 years  | 60-69 years  | 70-79 years  | 80-89 years  |
|                                                   | Immediate memory                                                                                                             | 17.87 (4.69) | 17.69 (4.83) | 16.18 (4.42) | 14.45 (3.70) |
|                                                   | 30 min recall                                                                                                                | 6.44 (1.89)  | 6.00 (2.19)  | 5.24 (1.96)  | 4.80 (1.91)  |
|                                                   | Cued recall                                                                                                                  | 6.96 (3.24)  | 7.03 (3.11)  | 6.33 (2.95)  | 5.62 (3.12)  |
|                                                   | Recognition                                                                                                                  | 11.10 (1.2)  | 10.80 (1.4)  | 10.70 (1.4)  | 19.50 (3.27) |
| Rey-Osterreith complex figure test <sup>b,1</sup> | Educational Years: Illiterate: 22.11 (7.55); 1-6 years: 29.06 (5.60); 7-12 years: 31.02 (3.42); above 12 years: 33.01 (2.13) |              |              |              |              |
| clock drawing test                                | No norms or borderlines could be provided                                                                                    |              |              |              |              |

a Borderlines, b norms. From Qihao Guo ZH. Neuropsychological evaluation. Shanghai Scientific & Technical Publishers, 2016.
